# Supplementary material
Source: PubMed Central journal article supplement (PMC9616720)
Supplement: mmc1.pdf [file mmc1.pdf]

## Supplemental information

### **Sodium-calcium exchanger-3 regulates pain “wind-up”: From human psychophysics to spinal mechanisms**

**Teodora Trendafilova, Kaustubh Adhikari, Annina B. Schmid, Ryan Patel, Erika Polgár, Kim I. Chisholm, Steven J. Middleton, Kieran Boyle, Allen C. Dickie, Evangelia Semizoglou, Jimena Perez-Sanchez, Andrew M. Bell, Luis Miguel Ramirez-Aristeguieta, Samar Khoury, Aleksandar Ivanov, Hendrik Wildner, Eleanor Ferris, Juan-Camilo Chacón-Duque, Sophie Sokolow, Mohamed A. Saad Boghdady, André Herchuelz, Pierre Faux, Giovanni Poletti, Carla Gallo, Francisco Rothhammer, Gabriel Bedoya, Hanns Ulrich Zeilhofer, Luda Diatchenko, Stephen B. McMahon, Andrew J. Todd, Anthony H. Dickenson, Andres Ruiz-Linares, and David L. Bennett**

Supplementary items

| Index SNP   | Chromosomal<br>Region | Alleles<br>(minor/<br>major) | P-value<br>(from<br>discovery<br>cohort) | Candidate<br>gene              | Beta | R <sup>2</sup> | Replication<br><i>P</i> -value from<br>second<br>Colombian<br>cohort | OPPERA<br>gene-level<br>Replication<br><i>P</i> -value<br>(rank) | Minor Allele Frequency |                     |                   |            |
|-------------|-----------------------|------------------------------|------------------------------------------|--------------------------------|------|----------------|----------------------------------------------------------------------|------------------------------------------------------------------|------------------------|---------------------|-------------------|------------|
|             |                       |                              |                                          |                                |      |                |                                                                      |                                                                  | Europeans<br>(IBS)     | Native<br>Americans | Africans<br>(YRI) | Colombians |
| rs58886412  | 1q21.3                | C/G                          | 1×10 <sup>-8</sup>                       | Intergenic<br><i>(S100A16)</i> | 0.43 | 3%             | 6×10 <sup>-3</sup>                                                   | 0.31<br><br>(8101)                                               | 2%                     | 2%                  | 18%               | 4%         |
| rs115943328 | 14q24.2               | C/T                          | 1×10 <sup>-11</sup>                      | <i>SLC8A3</i><br><i>(NCX3)</i> | 0.45 | 5%             | 3×10 <sup>-5</sup>                                                   | 3×10 <sup>-8</sup><br><br>(1)                                    | 0%                     | 0%                  | 18%               | 2%         |
| rs73240416  | 14q21.2               | G/A                          | 8×10 <sup>-9</sup>                       | <i>LINC00871</i>               | 0.67 | 3%             | 0.013                                                                | 0.005<br><br>(94)                                                | 0%                     | 0%                  | 31%               | 2%         |

**Supplementary Table 1. Features of SNPs most strongly associated with WUR on Chromosomes 1 and 14 in the Colombian cohort.** (Related to Figure 1) The two alleles are consecutively minor and major alleles.  $R^2$  refers to the proportion of trait variance explained by the SNP beyond that explained by the covariates. The primary association P-value, Beta and  $R^2$  are those obtained in the initial (discovery) Colombian cohort. Due to its internal heterogeneity (and differentiation from the Colombian sample), replication P-values for the OPPERA cohort refer to a gene-level association test. The rank of those P-values out of the 24,418 genes tested are also provided. Minor allele frequency for the Europeans (Iberians, IBS) and Africans (Yoruba, YRI) are obtained from the 1000 Genomes Project. Native American data are from (Chacón-Duque *et al.*, 2018). Colombians refers to the individuals examined here in the discovery cohort.

| Chrom. region | Type                | SNP         | Distance to index SNP (KB) | MAF | HWE P-value | R <sup>2</sup> with index SNP | Imputation quality metric* | Genotype calling plot for chip SNP |
|---------------|---------------------|-------------|----------------------------|-----|-------------|-------------------------------|----------------------------|------------------------------------|
| 1q21.3        | Index (imputed) SNP | rs58886412  | -                          | 4%  | 0.83        | -                             | 0.940                      |                                    |
|               | Chip genotyped SNP  | rs9727230   | 4.5                        | 4%  | 0.84        | 0.97                          | 0.980                      |                                    |
| 14q24.2       | Index (imputed) SNP | rs115943328 | -                          | 2%  | 0.09        | -                             | 0.988                      |                                    |
|               | Chip genotyped SNP  | rs11851507  | 28.5                       | 2%  | 0.06        | 0.42                          | 0.998                      |                                    |
| 14q21.2       | Index (imputed) SNP | rs73240416  | -                          | 2%  | 0.14        | -                             | 0.994                      |                                    |
|               | Chip genotyped SNP  | rs17117077  | 8.5                        | 2%  | 0.15        | 0.97                          | 0.998                      |                                    |

**Supplementary Table 2. Various quality measures for the three index SNPs and their nearby chip genotyped SNPs.** (Related to Figure 1) For each imputed index SNP, a nearby SNP is chosen among the SNPs on the genotyping chip which is in the same LD block as the index SNP and has the smallest P-value among all such chip SNPs. Various quality measures are presented for both the index SNP and this chip genotyped SNP.

MAF: Minor allele frequency.

HWE: Hardy-Weinberg equilibrium.

For the chip genotyped SNP, the distance to their index SNP (in KB), and their  $R^2$  with the index SNP is also provided. Their genotype calling plot, as produced by Illumina GenomeStudio v2.0 software, is also provided.

\* For each imputed SNP, the info metric reported by IMPUTE2 is provided. For each chip genotyped SNP, the concordance metric reported by IMPUTE2 is provided, which performs leave-one-out imputation and checks concordance with the true genotype

| <b>Phenotype</b>                    | <b>rs58886412<br/>(1q21.3)</b> | <b>rs115943328<br/>(14q24.2)</b> | <b>rs73240416<br/>(14q21.2)</b> |
|-------------------------------------|--------------------------------|----------------------------------|---------------------------------|
| Cold detection threshold (CDT)      | 0.487                          | 0.066                            | 0.758                           |
| Warm detection threshold (WDT)      | 0.469                          | 0.083                            | 0.316                           |
| Thermal sensory limen (TSL)         | 0.623                          | 0.195                            | 0.229                           |
| Heat pain threshold (HPT)           | 0.785                          | 0.473                            | 0.842                           |
| Mechanical pain threshold (MPT)     | 0.367                          | 0.699                            | 0.791                           |
| vibration detection threshold (VDT) | 0.728                          | 0.573                            | 0.034                           |
| Flare area                          | 0.224                          | 0.056                            | 0.121                           |
| Brush-evoked allodynia              | 0.153                          | 0.016                            | 0.760                           |
| Punctuate hyperalgesia              | 0.010                          | 0.108                            | 0.548                           |

**Supplementary Table 3. Association results for the three index SNPs with other QST phenotypes in the primary Colombian cohort.** (Related to Figure 1) The *P*-values for each of the three index SNPs for each of the QST phenotypes are presented.

| Chromosomal region | SNP         | Robust linear regression P-value | Box-Cox transformed trait P-value |
|--------------------|-------------|----------------------------------|-----------------------------------|
| 1q21.3             | rs58886412  | $5 \times 10^{-7}$               | $7 \times 10^{-7}$                |
| 14q24.2            | rs115943328 | $5 \times 10^{-10}$              | $1 \times 10^{-8}$                |
| 14q21.2            | rs73240416  | $4 \times 10^{-6}$               | $3 \times 10^{-5}$                |

**Supplementary Table 4. Robust test and transformed phenotype association results for the three index SNPs in the primary Colombian cohort.** (Related to Figure 1) The P-values for each of the three index SNPs are presented for two methods. First, a robust linear regression model was used for the WUR phenotype. Second, the WUR phenotype was transformed using the Box-Cox power transformation to make the distribution closer to a normal distribution and transformed trait values were then used in the classical linear regression model.

|           | Small (<25μm)      |                     |                                  | Medium (25<35μm)   |                     |                                  | Large (>35μm)      |                     |                                |
|-----------|--------------------|---------------------|----------------------------------|--------------------|---------------------|----------------------------------|--------------------|---------------------|--------------------------------|
|           | NCX3 <sup>WT</sup> | NCX3 <sup>HOM</sup> | Test                             | NCX3 <sup>WT</sup> | NCX3 <sup>HOM</sup> | Test                             | NCX3 <sup>WT</sup> | NCX3 <sup>HOM</sup> | Test                           |
| No. Cells | 35                 | 29                  |                                  | 33                 | 32                  |                                  | 14                 | 13                  |                                |
| Cm (pF)   | 14.21<br>(±0.73)   | 11.62<br>(±0.66)    | MW,<br><i>P</i> =0.01,<br>*      | 28.55<br>(±1.17)   | 23.94<br>(±0.94)    | MW<br><i>P</i> =0.0017<br>**     | 44.57<br>(±2.00)   | 40.85<br>(±2.13)    | uTt<br><i>P</i> =0.213<br>n.s. |
| InR (MΩ)  | 301.30<br>(±21.4)  | 618.20<br>(±67.4)   | MW,<br><i>P</i> <0.0001,<br>**** | 96.02<br>(±10.5)   | 197.10<br>(±24.5)   | MW,<br><i>P</i> <0.0001,<br>**** | 31.25<br>(±4.92)   | 69.90<br>(±15.01)   | MW,<br><i>P</i> =0.002,<br>**  |
| RMP (mv)  | -53.78<br>(±1.43)  | -45.88<br>(±1.52)   | MW,<br><i>P</i> =0.0002,<br>***  | -63.03<br>(±0.80)  | -61.70<br>(±0.95)   | uTt,<br><i>P</i> =0.287,<br>n.s  | -65.61<br>(±0.88)  | -65.12<br>(±0.97)   | uTt,<br><i>P</i> =0.71,<br>n.s |

**Supplementary Table 5. Passive electrophysiological properties of DRG neurons isolated from NCX3<sup>WT</sup> and NCX3<sup>HOM</sup> mice.** (Related to Supplementary Figure 6 and Figure 3,4 and 6) Mean (±SEM), Cm = Membrane Capacitance, InR = Input Resistance, RMP = Resting Membrane Potential, MW = Mann Whitney Test, uTt = unpaired T-test. \* - *P*<0.05, \*\* - *P*<0.001, \*\*\* - *P*<0.0001, \*\*\*\* - *P*<0.0001



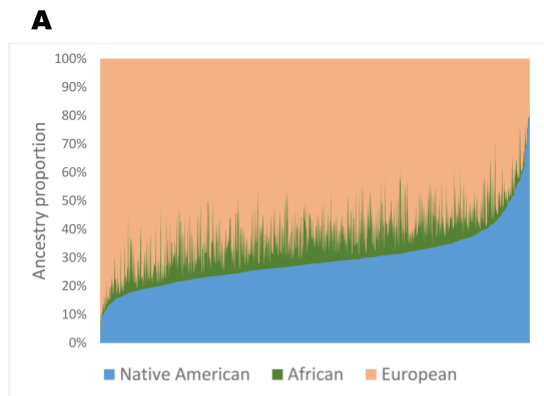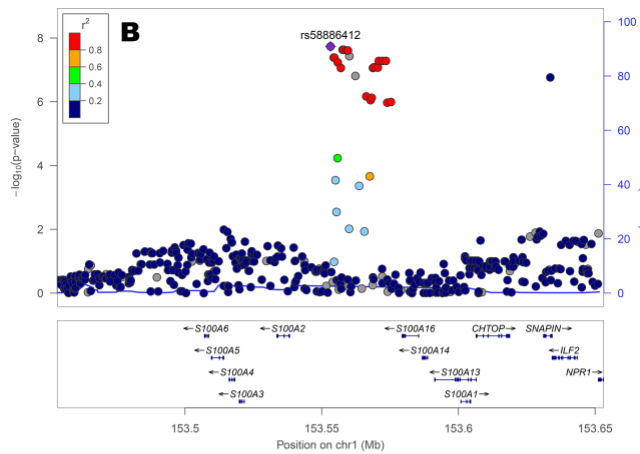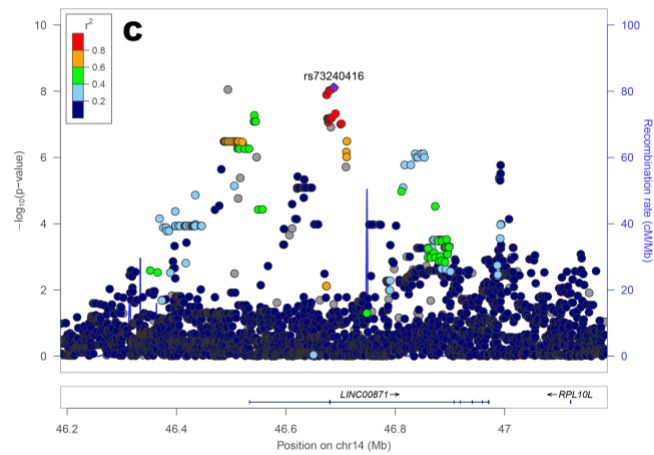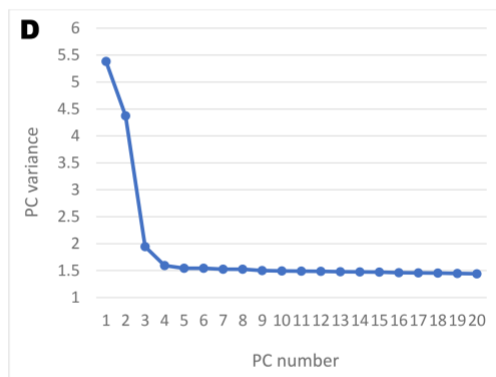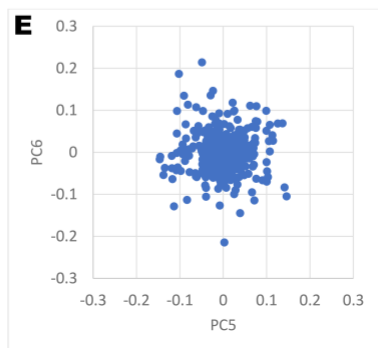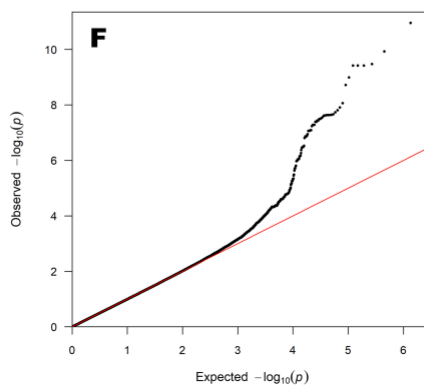

**Supplementary Figure 1. Supporting results from human genetic association studies in the Colombian cohort.** (Related to Figure 1) **A.** Continental ancestry estimates of the Colombian participants, using three ancestral components as reference: Native American, European, and African. **B.** LocusZoom plot of the association results around the index SNP rs58886412 in chromosome 1q21.3. Negative logarithm of the GWAS P-values are plotted on the Y axis. **C.** LocusZoom plot of the association results around the index SNP rs73240416 in chromosome 14q21.2. **D.** Scree plot showing the variance of the top 20 Genetic principal components (PCs) obtained using chip genotyped SNPs. Based on this plot and the pairwise scatterplots of PCs, the top 4 PCs were chosen to be indicative of population substructure and to be used as covariates in the GWAS. **E.** Scatterplot of PCs 5 & 6, indicating that no residual substructure is visible. **F.** Q-Q plot of GWAS P-values for WUR in the Colombian cohort. Negative logarithm of the observed and expected P-values are plotted on the Y and X axis respectively. The diagonal red line is provided for reference. The genomic inflation factor  $\lambda$  was 0.9986.

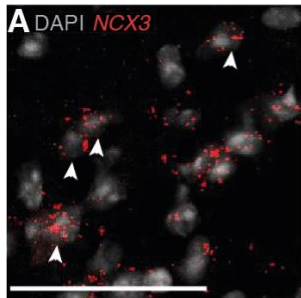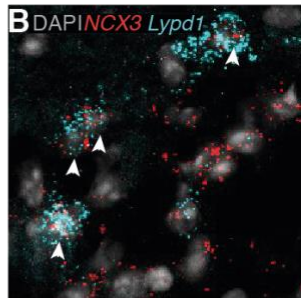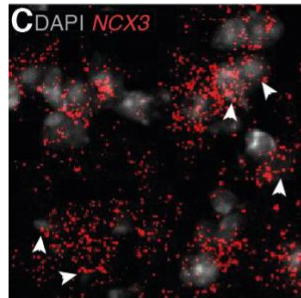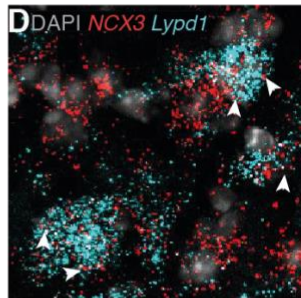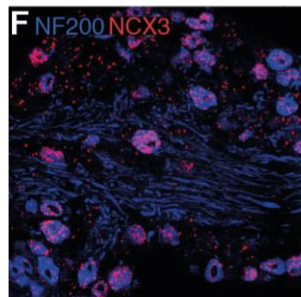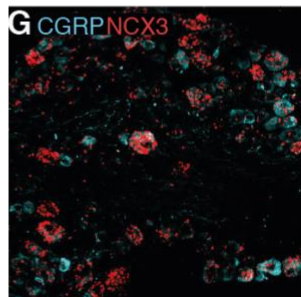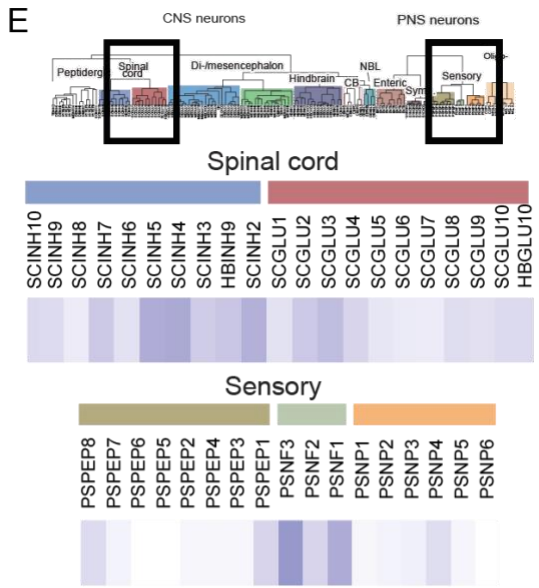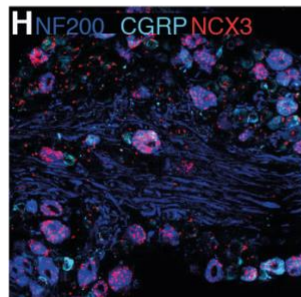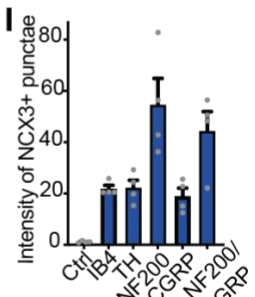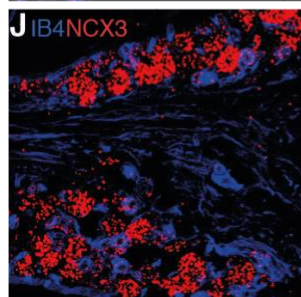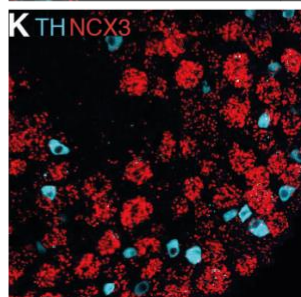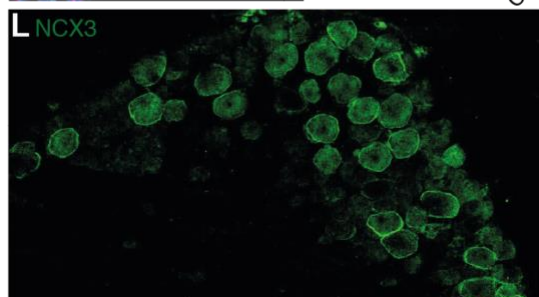

**Supplementary Figure 2. Expression of NCX3 in DH projection neurons and dorsal root ganglia.** (Related to Figure 2) **A-D.** Qualitative example image showing multiplex ISH for *NCX3* and *Lypd1* (projection neuron marker) mRNA in the spinal dorsal horn. **E.** Data from (Zeisel et al., 2018) derived from <http://mousebrain.org/adolescent> showing expression levels of *NCX3* in spinal cord and sensory neurons please see **F-K.** Representative images of *NCX3* in-situ hybridisation (ISH) combined with immunofluorescence for DRG neuronal markers (IB4, CGRP, NF200 and TH). **I.** Quantification of the 5 images from F-K as average intensity (AU). **L.** Qualitative example image showing *NCX3* protein expression in the DRG. (3 images per animal, n=5 animals). Scale bar = 50  $\mu\text{m}$ .

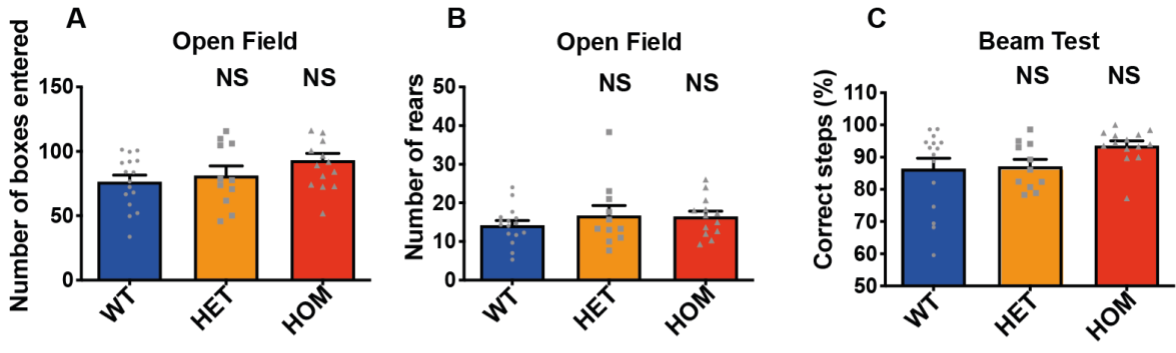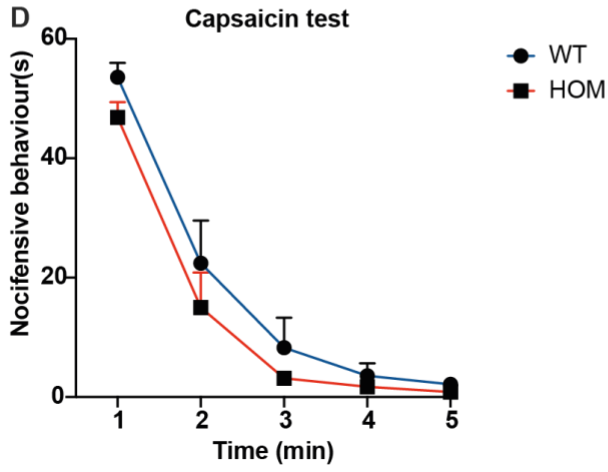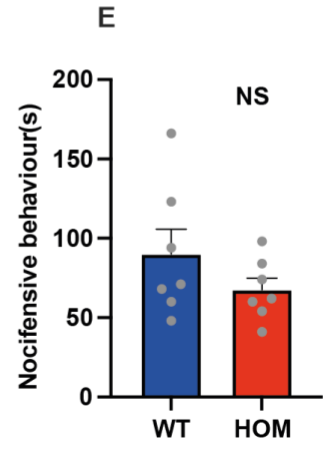

**Supplementary Figure 3. Lack of motor phenotypes in NCX3<sup>HET</sup> and NCX3<sup>HOM</sup> mice.** (Related to Figure 3) **A-C** Motor/anxiety/balance behaviour tests. Data are mean  $\pm$  SEM, WT n=16, NCX3<sup>HET</sup> n=11, NCX3<sup>HOM</sup> n=13. **D and E.** Response over time during the first 5 minutes post capsaicin injection. **B.** Mean results from the first 5 minutes post-injection. Data are mean  $\pm$  SEM, WT n=7, NCX3<sup>HOM</sup> n=7. Data analysis: Significance shows comparison to WT (NS P>0.05). Data analysis – One-Way ANOVA, Dunnett's multiple comparisons test (A-C). Two-Way ANOVA, Sidak multiple comparisons test (D); Unpaired T-test (E).



## Selection of dorsal horn neurons

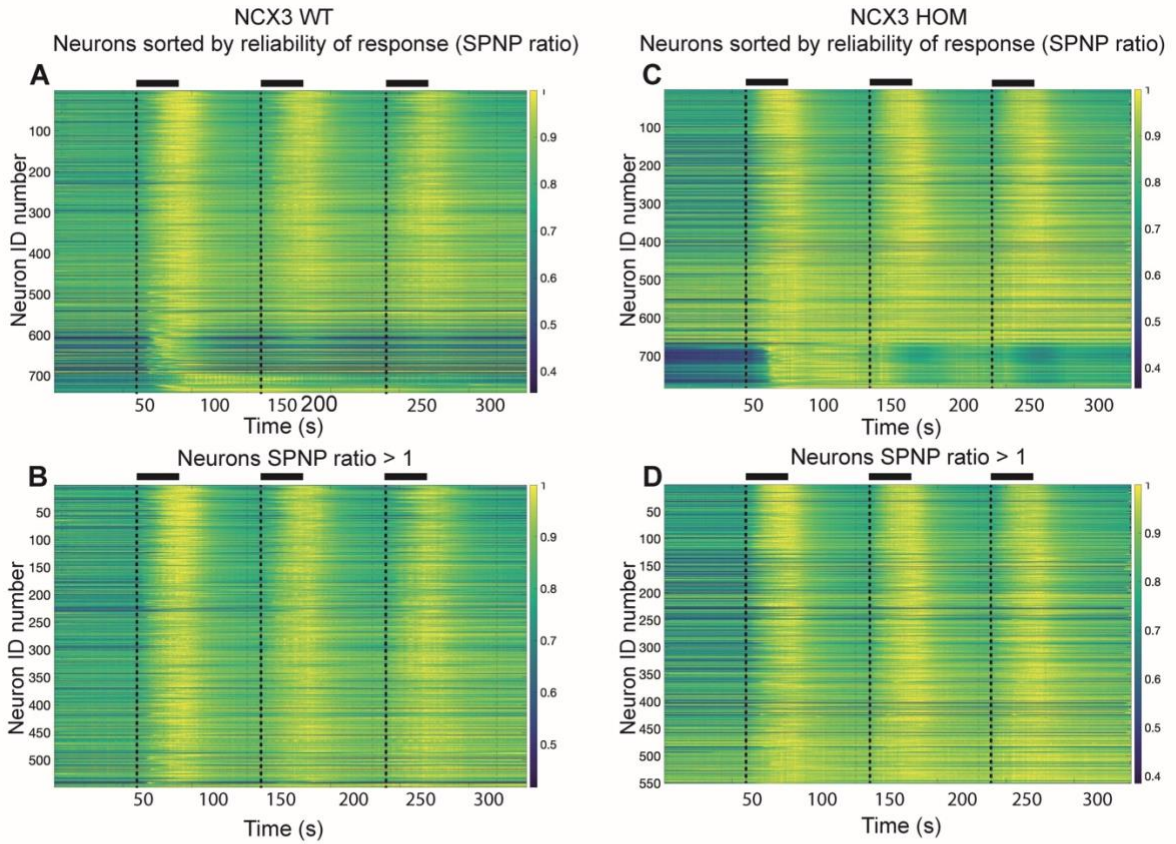

## Selection of DRG neurons

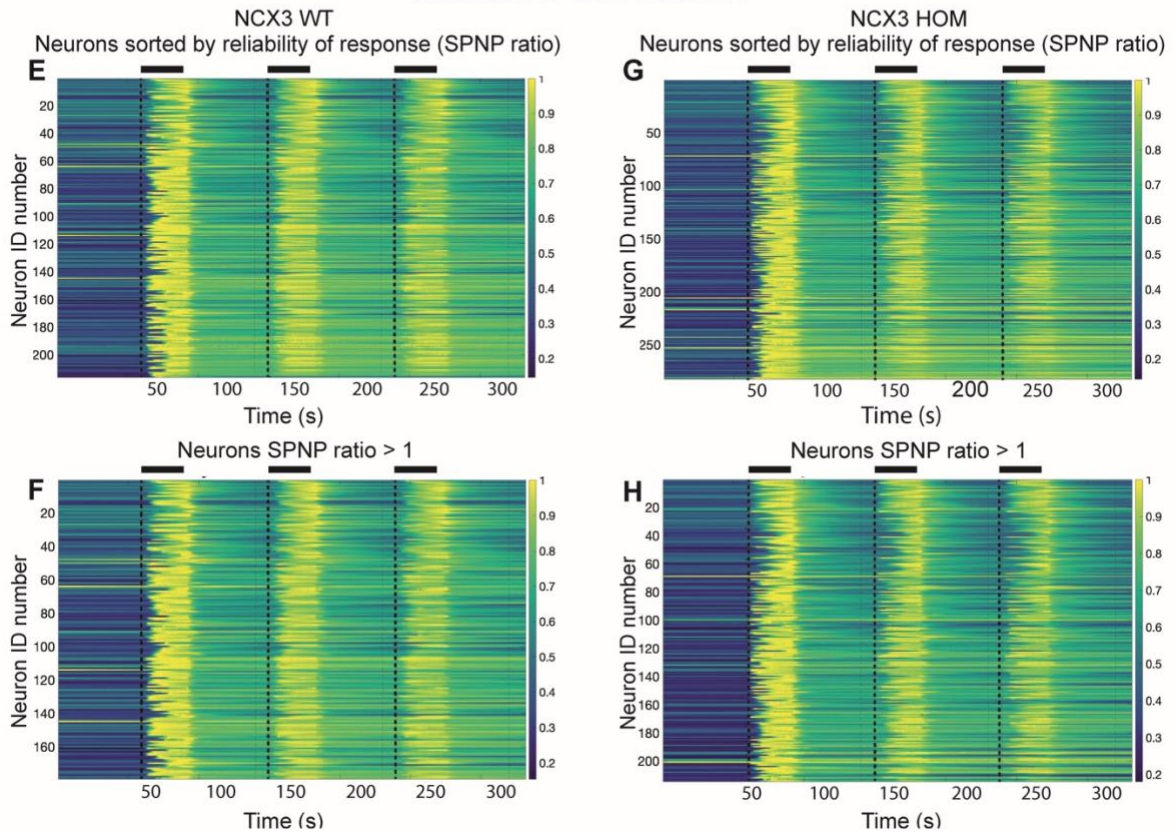

**Supplementary Figure 4. Sorting of cultured neurons based on calcium imaging response reliability.**

(Related to Figure 4) **A, C.** Raster plots showing the  $\text{Ca}^{2+}$  responses of DH neurons to 50mM  $\text{K}^+$  pulses (each pulse starting at 60, 150 or 240 seconds and lasting for 30 seconds). Beginning and duration of each  $\text{K}^+$  pulse - described with dashed vertical lines and black bars. Neurons were sorted based on similarity between their three  $\text{Ca}^{2+}$  responses (reliability, as measured by Signal power/Noise power ratio). **B and D.** Raster plots showing the dorsal horn neurons from A (WT) and B ( $\text{NCX3}^{\text{HOM}}$ ), respectively, which displayed reliability of response (SPNP ratio) higher than 1. **E, G** Raster plots showing the  $\text{Ca}^{2+}$  responses of DRG neurons to 50mM  $\text{K}^+$  pulses. **F, H.** Sorted DRG neurons, SPNP ratio > 1. Plot colour scheme – blue to yellow corresponds to low to high  $\text{Ca}^{2+}$  level.



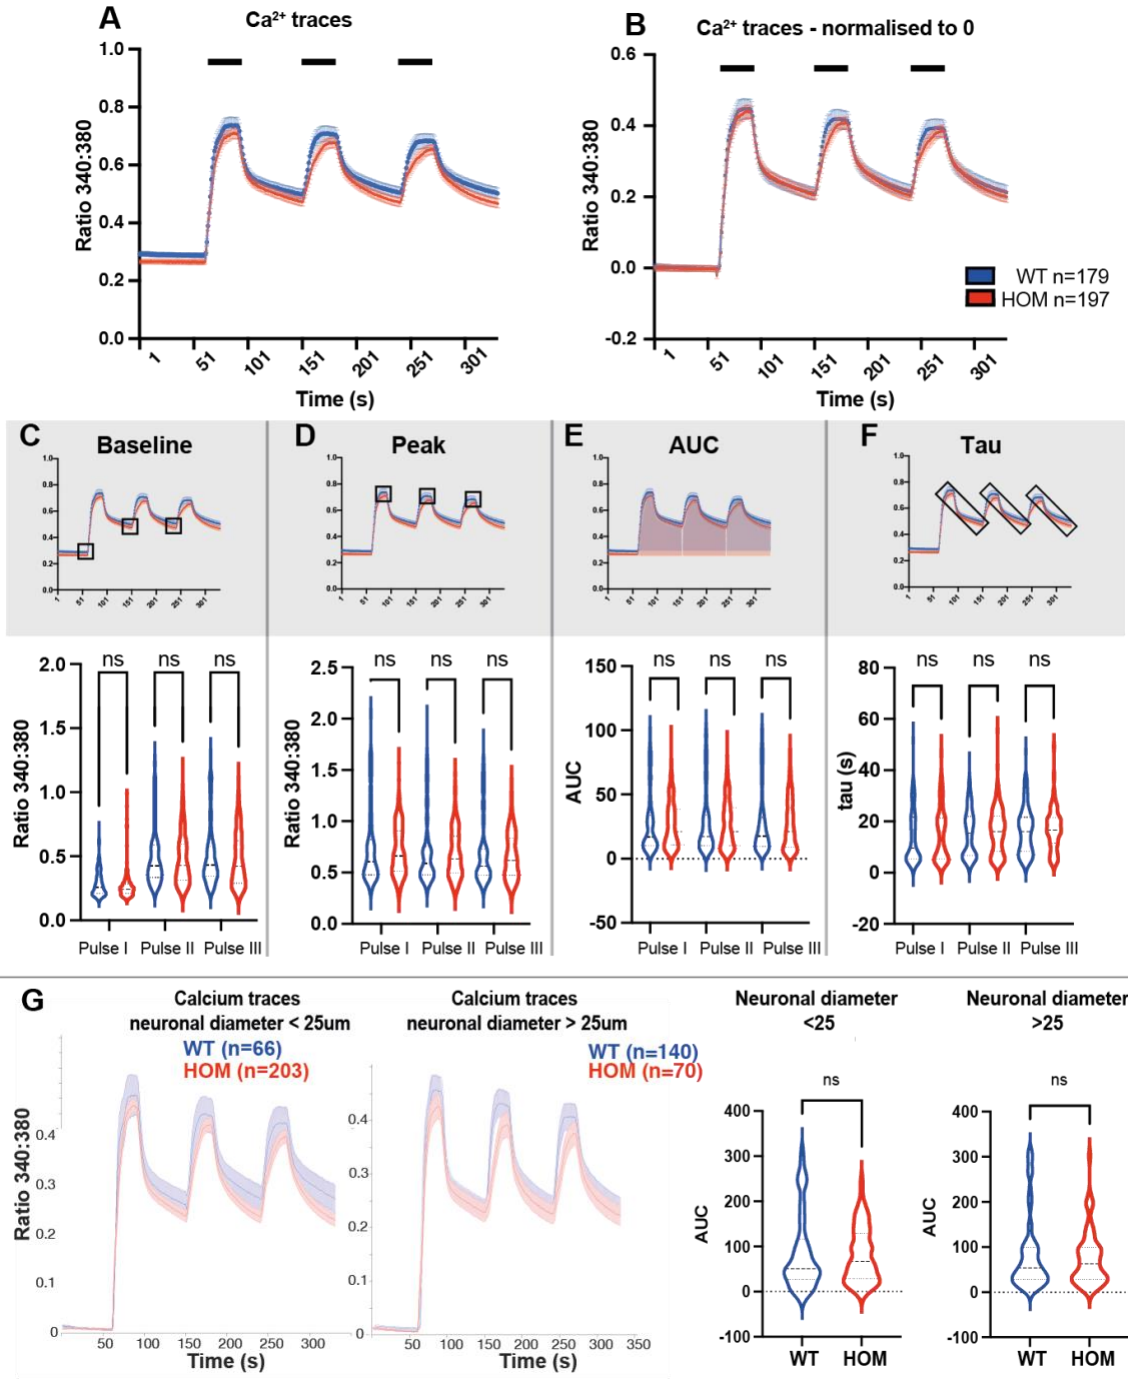

**Supplementary Figure 5. No change to Ca<sup>2+</sup> dynamics in cultured NCX3<sup>HOM</sup> DRG neurons.** (Related to Figure 4) **A.** Ca<sup>2+</sup> traces during 3 K<sup>+</sup> pulses (mean ± SEM). **B.** Traces after baseline normalisation. **C-F.** Assessed properties of the calcium imaging traces, top panels in grey are schematics explaining the properties compared in panels below shown as violin plots; **C.** Baselines at 60 seconds (Pulse I), 150 seconds (Pulse II) and 240 seconds (Pulse III). **D.** Peaks at 90 seconds (Pulse I), 180 seconds (Pulse II) and 270 seconds (Pulse III). **E.** Area under the curve (AUC) for 60 to 150 seconds (Pulse I), 150-240 seconds (Pulse II) and 240-330 seconds (Pulse III). **F.** Exponential decay time constant (tau) for 90 -150 seconds (Pulse I), 180 to 240 seconds (Pulse II) and 270 to 330 seconds (Pulse III). **G.** Sub-group analysis based on neuronal cell diameter shown as violin plots. Significance was assessed with One-Way ANOVA, Tukey test, NS P>0.5. n=179 WT and 197 NCX3<sup>HOM</sup> DRG neurons, from WT n=5 and NCX3<sup>HOM</sup> n=5 mice (A-F). Student's T-test (G).

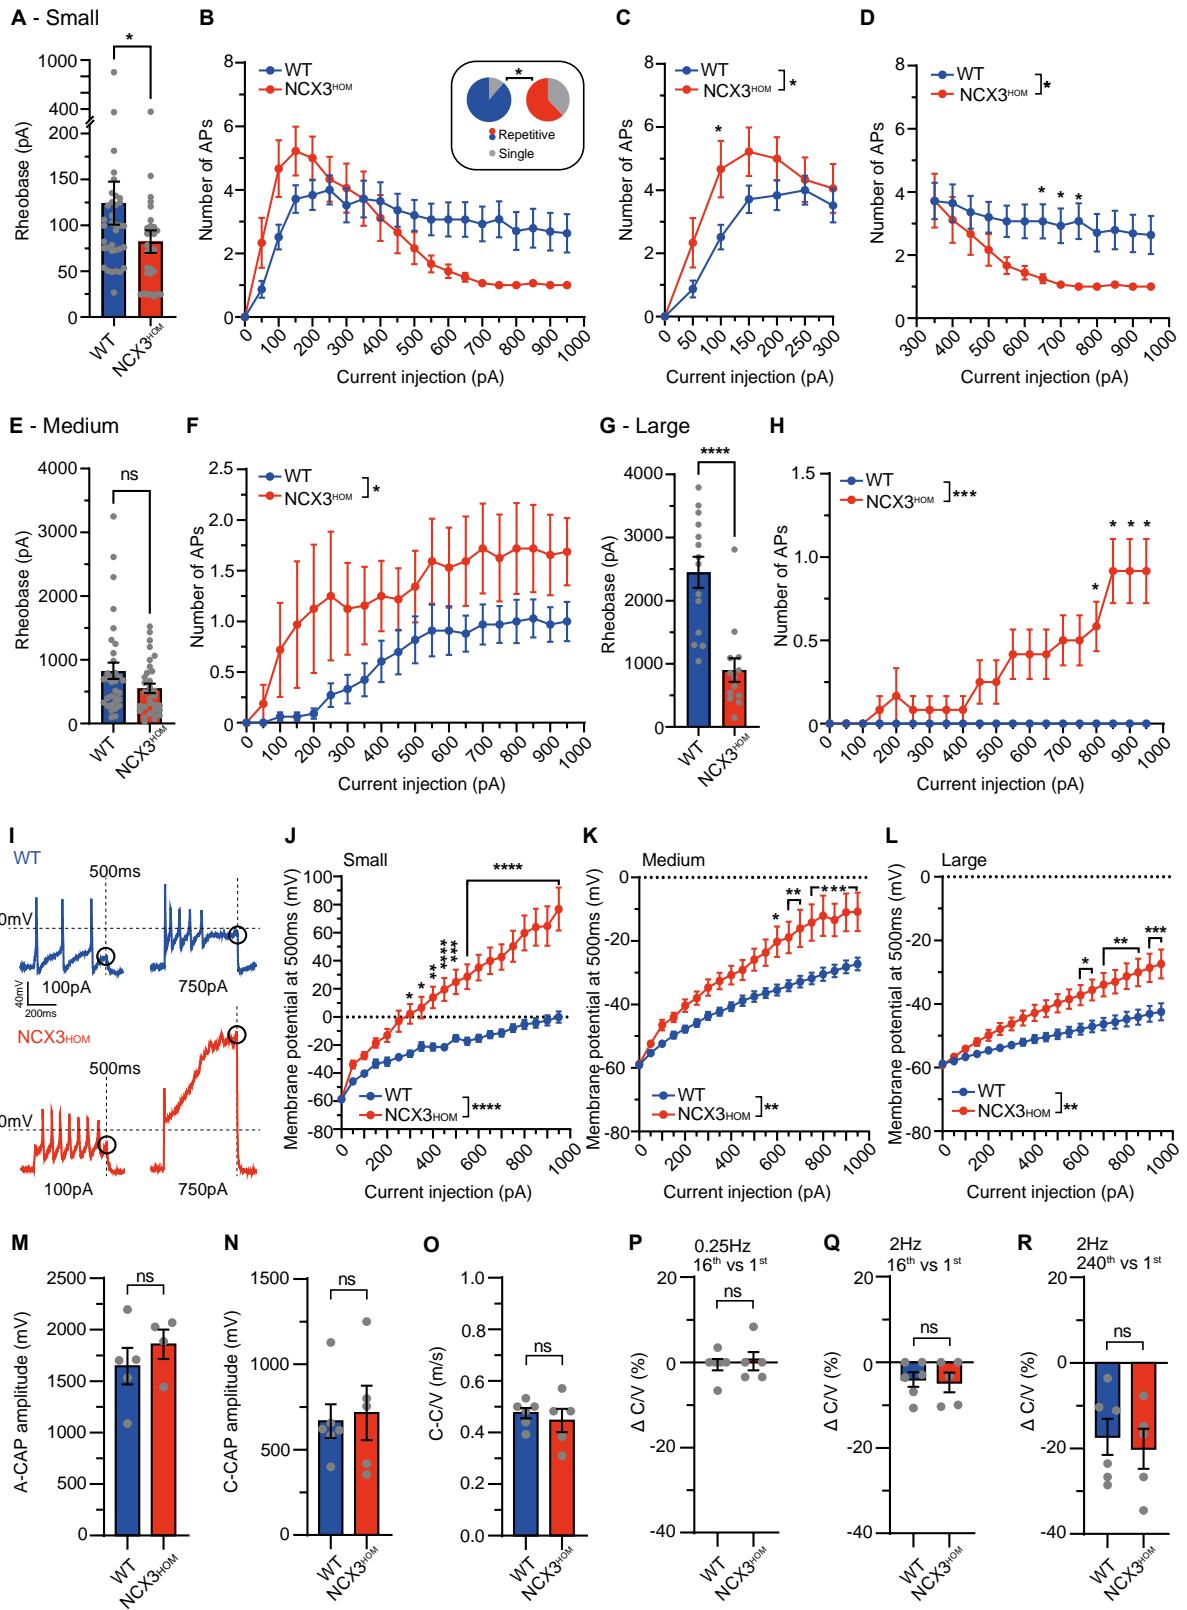

**Supplementary Figure 6: Soma excitability, but not axonal conduction, is altered in NCX3<sup>HOM</sup> mice**

(Related to Figure 3,4 and 6) **A.** The Rheobase of small DRG neurons was significantly reduced in NCX3<sup>HOM</sup> mice. (WT n= 35, NCX3<sup>HOM</sup> n = 29, Mann-Whitney test, \*P<0.05). **B.** Fewer small DRG neurons repetitively fire APs in response to 500ms current injections ranging 0-950 pA. (WT n=31 rep, 4 single, NCX3<sup>HOM</sup> n=18 rep, 11 single, Fisher's exact test, \*P<0.05). Only repetitively firing neurons were plotted for each genotype. **C.** Repetitively firing small neurons from NCX3<sup>HOM</sup> mice fire more APs in response to current injections ranging 0-300 pA (WT n=31, NCX3<sup>HOM</sup> n= 18, RM two-way ANOVA, with Bonferroni's post hoc test, \*P<0.05). **D.** Repetitively firing small neurons from NCX3<sup>HOM</sup> mice fire fewer APs in response to current injections ranging 350-950 pA (WT n=31, NCX3<sup>HOM</sup> n= 18, RM two-way ANOVA, with Bonferroni's post hoc test, \*P<0.05). **E.** The Rheobase of medium DRG neurons was unchanged in NCX3<sup>HOM</sup> compared to WT mice. (WT n= 33, NCX3<sup>HOM</sup> n = 32, Mann-Whitney test, n.s P>0.05). **F.** The number of repetitively firing medium sized neuron was unchanged between NCX3<sup>HOM</sup> and WT mice (WT n=7 rep, 26 single, NCX3<sup>HOM</sup> n=13 rep, 19 single, Fisher's exact test, P>0.05). All medium neurons were plotted for each genotype. NCX3<sup>HOM</sup> medium DRG neurons fire more APs in response to 500ms current injections ranging 0-950 pA (WT n=33, NCX3<sup>HOM</sup> n= 32, RM two-way ANOVA, \*P<0.05). **G.** The Rheobase of large DRG neurons was significantly reduced in NCX3<sup>HOM</sup> mice compared to WT (WT n= 14, NCX3<sup>HOM</sup> n = 13, Mann-Whitney test, \*\*\*\*P<0.0001). **H.** NCX3<sup>HOM</sup> large DRG neurons fire more APs in response to 500ms current injections ranging 0-950 pA. Note that large WT do not fire APs to current injections below 1000 pA (WT n=14, NCX3<sup>HOM</sup> n= 13, RM two-way ANOVA, with Bonferroni's post hoc test, \*P<0.05, \*\*\*P<0.001). **I.** Example traces of a small WT and small NCX3<sup>HOM</sup> DRG neuron. Traces illustrate APs elicited by 100 and 750 pA. Peak membrane potential at 500ms was analysed in subsequent figures (Circled). **J-L.** The membrane potential at 500ms across increasing current injections for small, medium, and large DRG neurons, respectively. For all cell sizes, NCX3<sup>HOM</sup> DRG neurons became significantly more depolarised in response to prolonged (500ms) current injections, compared to WT recordings. Note this is most striking for small cells (J) where membrane potential depolarisation exceeds 0mV. (J-L: Mixed Model-effects RM ANOVA with Bonferroni's post hoc test, \*P<0.05, \*\*P<0.01, \*\*\*P<0.001, \*\*\*\* P<0.0001). Compound action potentials (CAPs) were recorded from mouse saphenous nerves. **M.** A-fibre CAP amplitudes were comparable between WT and NCX3<sup>HOM</sup> mice (WT n = 5 nerves, 3 mice, NCX3<sup>HOM</sup> n = 4 nerves, 3 mice, unpaired T-test, P>0.05). **N.** C-fibre CAP amplitudes were comparable between WT and NCX3<sup>HOM</sup> mice (WT n = 6 nerves, 3 mice, NCX3<sup>HOM</sup> n = 5 nerves, 3 mice, unpaired T-test, P>0.05). **O.** There was no significant difference in the C-fibre CAP conduction velocities of WT or NCX3<sup>HOM</sup> nerves (WT n = 6 nerves, 3 mice, NCX3<sup>HOM</sup> n = 5 nerves, 3 mice, unpaired T-test, P>0.05). **P.** C-CAPs were recorded at 0.25Hz for 16 stimuli. The change in conduction velocity was calculated ( $\Delta\%$ ) for the 16<sup>th</sup> vs 1<sup>st</sup> stimulus. C-CAPs from WT and NCX3<sup>HOM</sup> nerves did not exhibit C/V slowing during this protocol. **Q.** C-CAPs were recorded at 2Hz for 16 stimuli. The change in conduction velocity was calculated ( $\Delta\%$ ) for the 16<sup>th</sup> vs 1<sup>st</sup> stimulus. C-CAPs from WT and NCX3<sup>HOM</sup> nerves exhibited very little C/V slowing during this protocol. **R.** C-CAPs were recorded at 2Hz for 240 stimuli. The change in conduction velocity was calculated ( $\Delta\%$ ) for the 240<sup>th</sup> vs 1<sup>st</sup> stimulus. C-CAPs from both WT and NCX3<sup>HOM</sup> nerves exhibited C/V slowing during this protocol. P-R, no differences were observed between

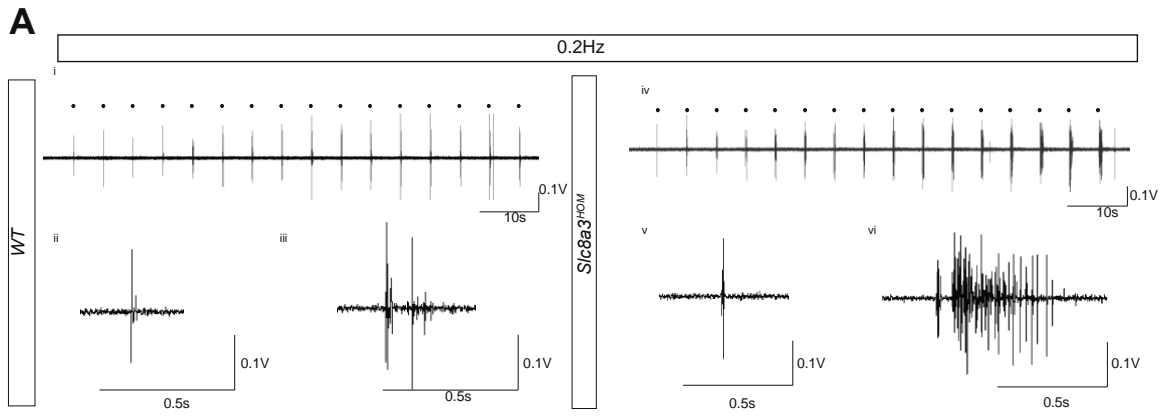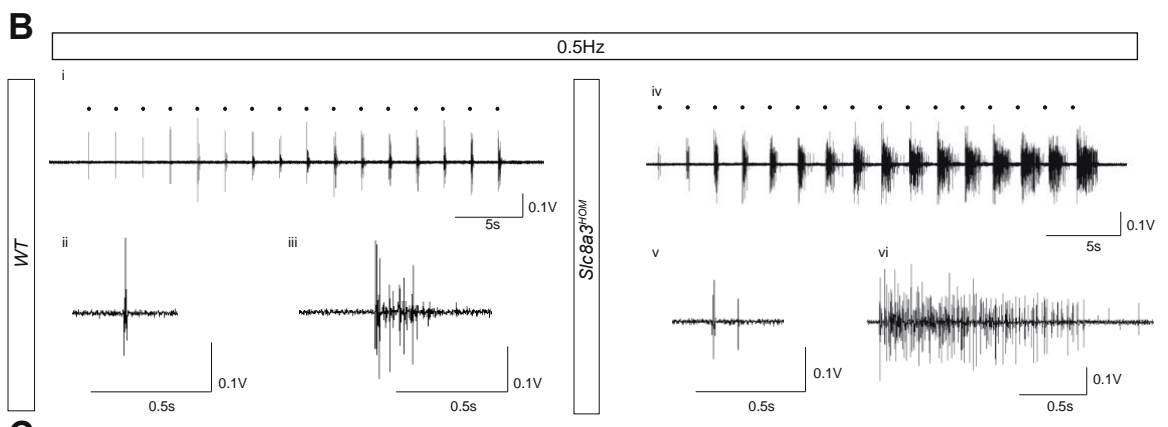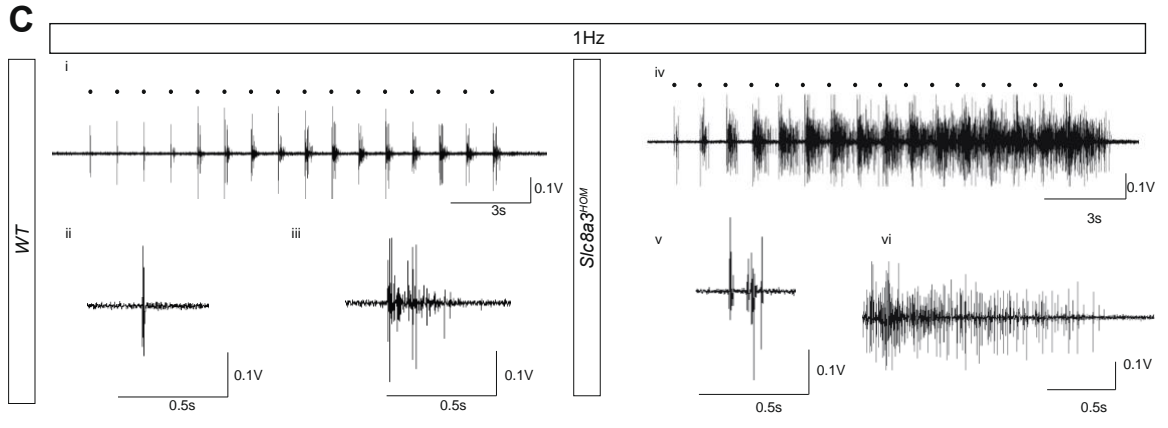

**Supplementary Figure 7. Enhanced flexion reflex motoneuron responses.** (Related to Figure 7.E) **A-C.** Example traces at 0.2, 0.5 and 1Hz stimulation for WT (left panels) and NCX3<sup>HOM</sup> mice (right panels), during the train of 16 stimulations (i and iv), at stimulus 1 (ii and v) or at stimulus 16 (iii or vi)

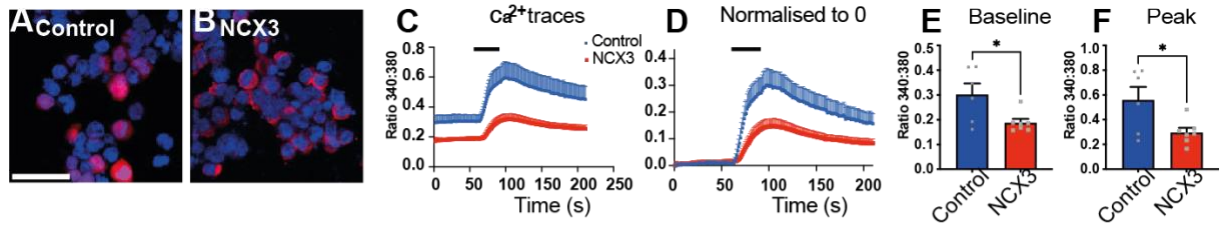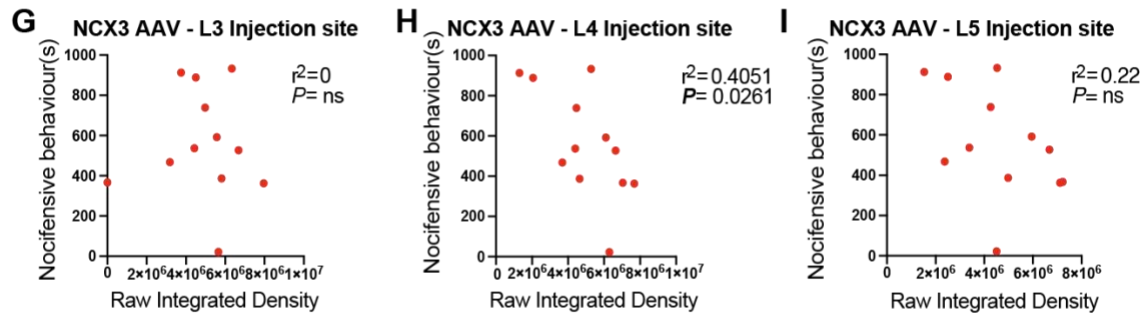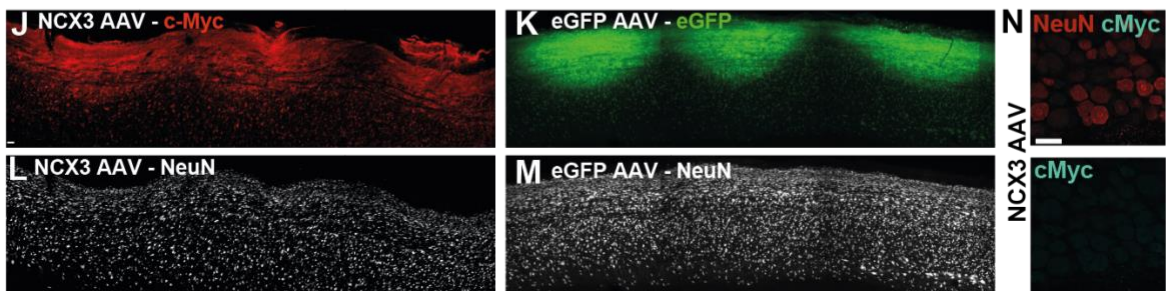

**Supplementary Figure 8. Overexpression of NCX3 – HEK cells and *in vivo* characteristics.** (Related to Figure 8) **A and B.** Expression of mCherry (control) and NCX3-B-c-Myc plasmids in HEK cells. **C and D.** Ca<sup>2+</sup> traces during 1μM Ionomycin treatment (mean ± SEM). Black bar shows duration of treatment. **E and F.** Baseline and peak quantification of traces. **G-I.** Pearson's correlation between nocifensive behaviour in the NCX3-B-injected group during the second phase of the formalin test and raw integrated density (collective measure of size and staining intensity at the injection site). Note that at the level of L4 there was a significant negative correlation between the duration of nocifensive behaviour and the density of c-Myc immunostaining. **J-M.** Expression of NCX3-B-c-Myc and eGFP in spinal cord sagittal sections at L3, 4, 5 spinal segments. **N.** Representative images of DRG sections post-surgery. Note that no c-myc positive cells were detected in the DRG. Ca<sup>2+</sup> imaging statistics (E and F) – \*  $P < 0.05$ , unpaired Student's T-test (n=6 Control and n=7 NCX3 coverslips). Pearson's correlation (G-I) calculated by Graph Pad Prism 9.0. Statistics - two-tailed statistical test as recommended by software. Scale bars = 50 μm.
